# Supplementary material for: 1,5-Diaminonaphthalene functionalized carbon nanodots as a novel matrix for the analysis of small molecules by matrix-assisted laser desorption/ionization mass spectrometry
Source: Royal Society of Chemistry journal article supplement (doi:10.1039/c8ay02665c), 2019-01-01
Supplement: c8ay02665c1.pdf [file c8ay02665c1.pdf]

## Supporting Information

### **1,5-Diaminonaphthalene functionalized carbon nanodots as a novel matrix for the analysis of small molecules by matrix assisted laser desorption/ionization mass spectrometry**

Yueying Zhang<sup>ab</sup>, Dan Gao<sup>\*bc</sup>, Shangfu Li<sup>bc</sup>, Weili Wei<sup>d</sup>, Jinshun Lin<sup>bc</sup>, and Yuyang Jiang<sup>bc</sup>

<sup>a</sup>. Department of Chemistry, Tsinghua University, Beijing 100084, China

<sup>b</sup>. State Key Laboratory of Chemical Oncogenomics, the Graduate School at Shenzhen, Tsinghua University, Shenzhen, 518055, China. E-mail: gao.dan@sz.tsinghua.edu.cn

<sup>c</sup>. Key Laboratory of Metabolomics at Shenzhen, Graduate School at Shenzhen, Tsinghua University, Shenzhen, 518055, China

<sup>d</sup>. School of Pharmaceutical Sciences, Chongqing University, Chongqing, 401331, China

<sup>e</sup>. School of Pharmaceutical Sciences, Tsinghua University, Beijing, 100084, China

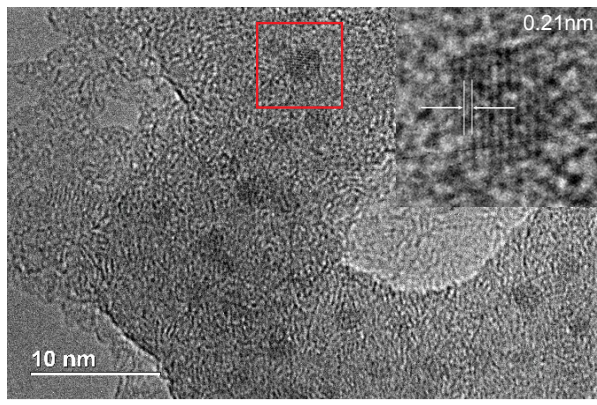

**Fig. S1** HRTEM image of the CDs.

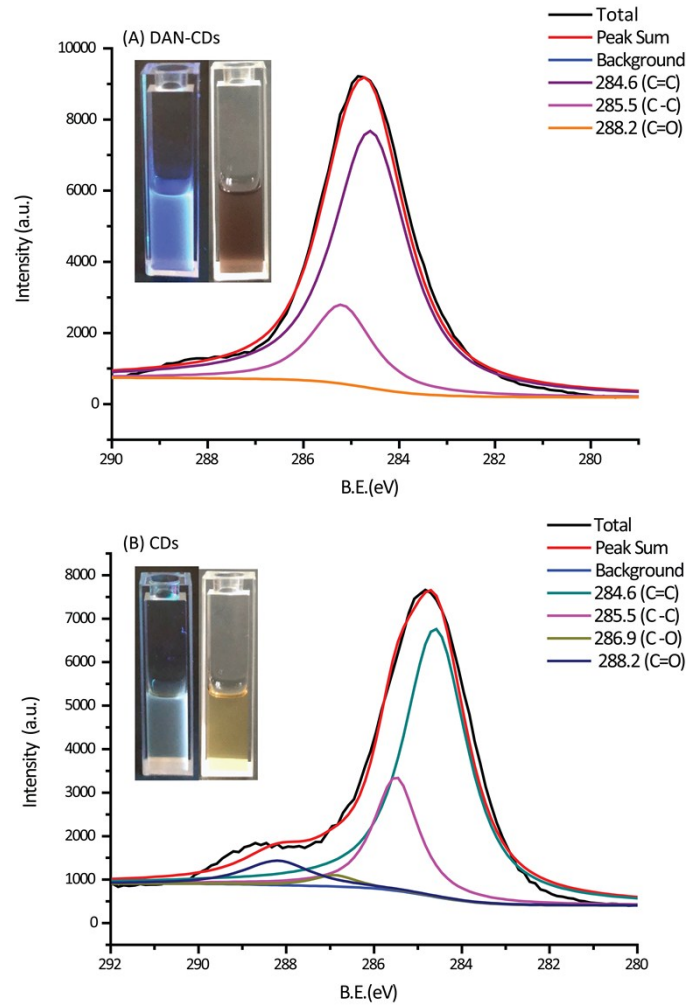

**Fig. S2** High-resolution XPS spectra of C1s peaks of the (A) DAN-CDs, inset: photographs of the obtained DAN-CDs under illumination UV (365nm) light (left) and daylight (right). (B) CDs, inset: photographs of the obtained CDs under illumination UV (365nm) light (left) and daylight (right).

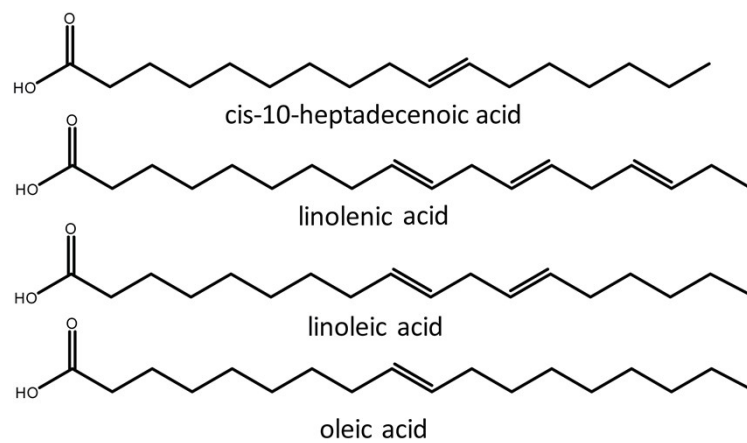

**Fig. S3** The chemical structures of fatty acids.

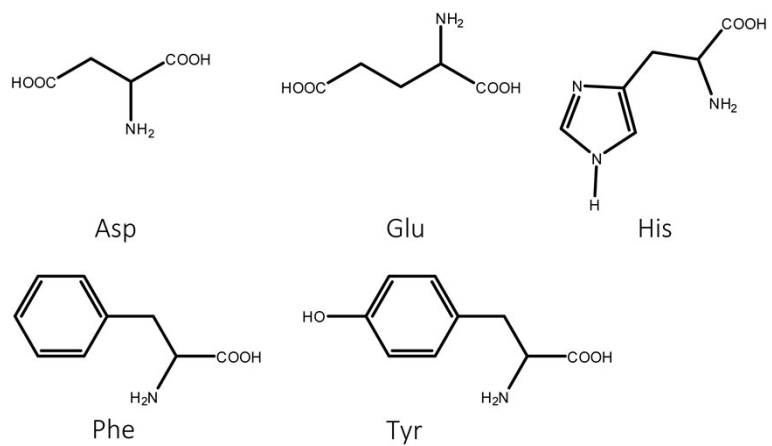

**Fig. S4** The chemical structures of amino acids.

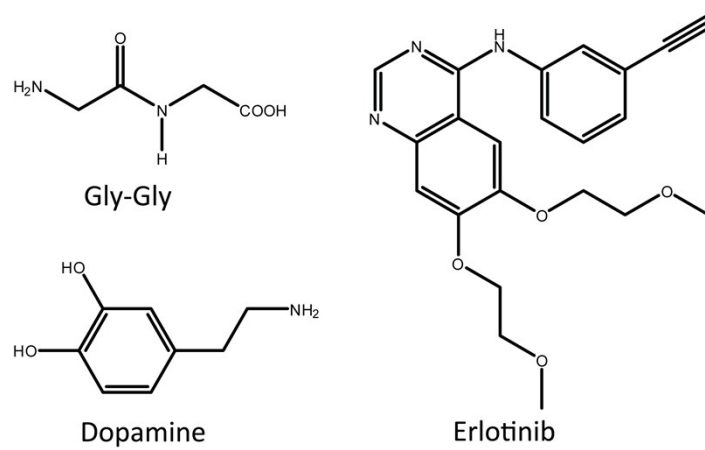

**Fig. S5** The chemical structures of Gly-Gly, dopamine and erlotinib.

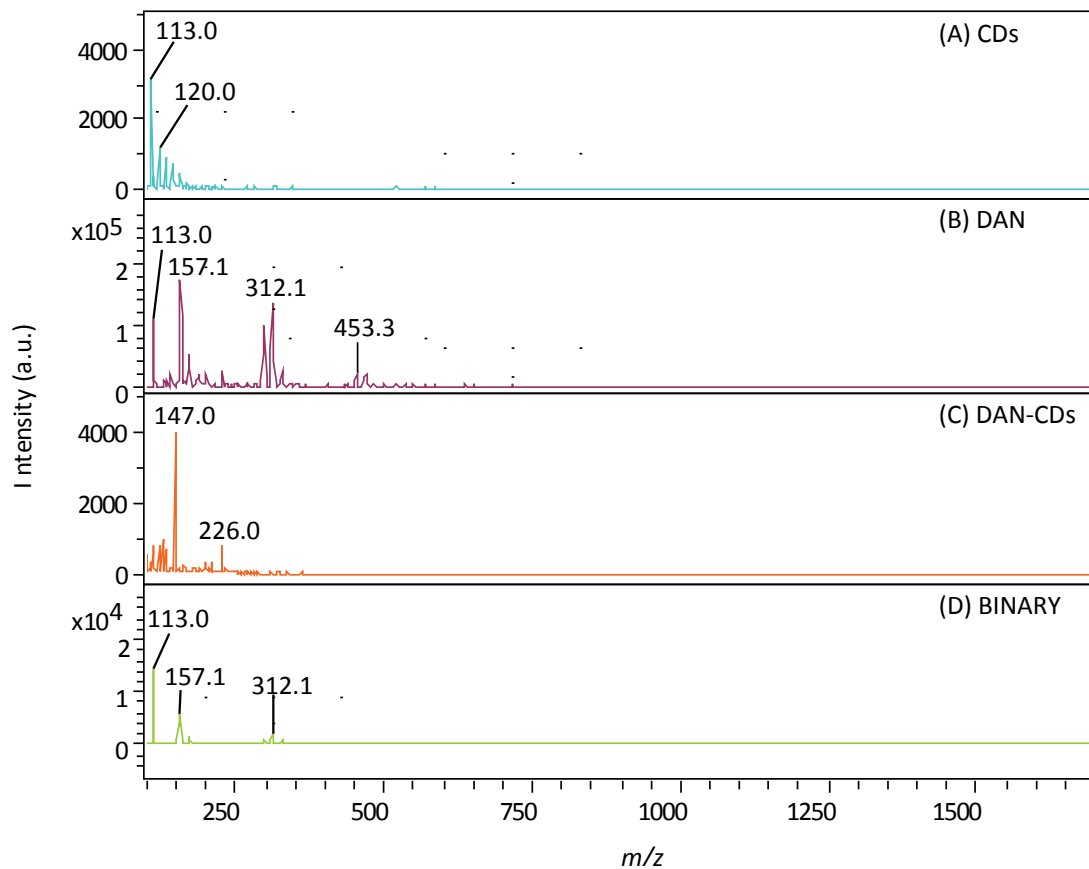

**Fig. S6** Backgrounds for (A) CDs, (B) DAN, (C) DAN-CDs and (D) binary matrix.

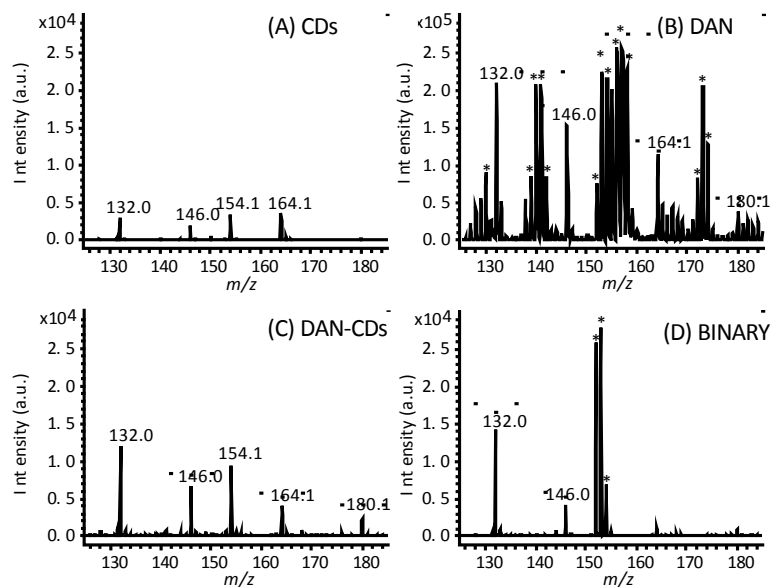

**Fig. S7** Mass spectra of amino acids mixture (5 mM) by using different matrices in negative ion mode ( $m/z$  132.0 [Asp-H]<sup>-</sup>,  $m/z$  146.0 [Glu-H]<sup>-</sup>,  $m/z$  154.1 [His-H]<sup>-</sup>,  $m/z$  164.1 [Phe-H]<sup>-</sup>,  $m/z$  180.1 [Tyr-H]<sup>-</sup>). Matrix-related ions were marked with asterisk. Laser intensity: 70%.



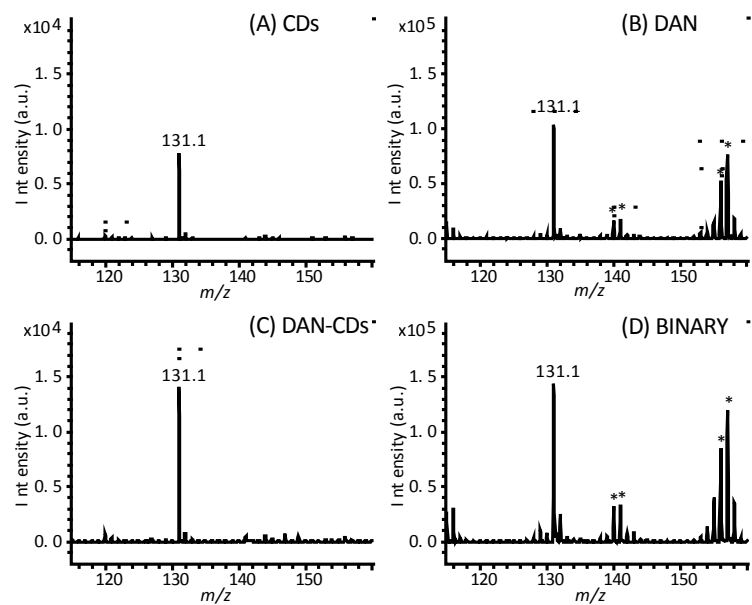

**Fig. S8** Mass spectra of Gly-Gly (5 mM) by using different matrices in negative ion mode ( $m/z$  131.1 [Gly-Gly-H]<sup>-</sup>). Matrix-related ions were marked with asterisk. Laser intensity: 70%.

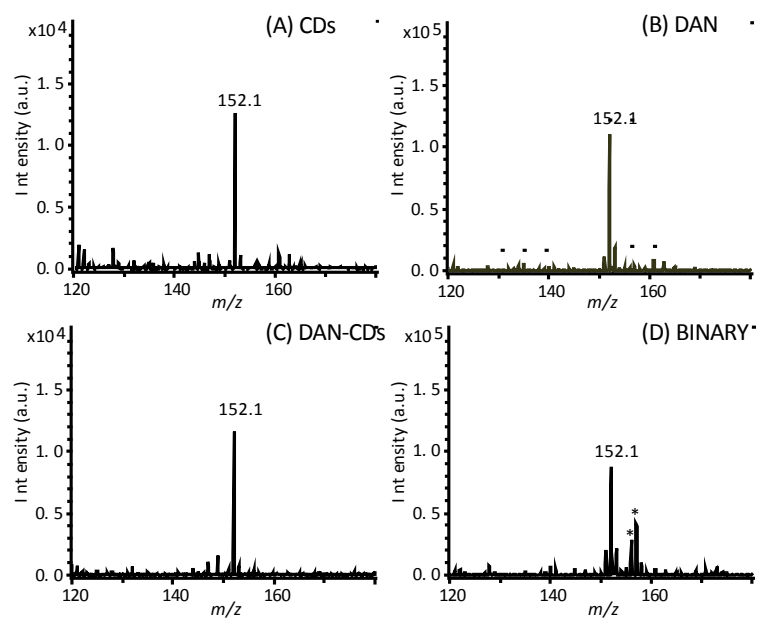

**Fig. S9** Mass spectra of dopamine (5 mM) by using different matrices in negative ion mode ( $m/z$  152.1 [Dopamine-H]<sup>-</sup>). Matrix-related ions were marked with asterisk. Laser intensity: 70%.

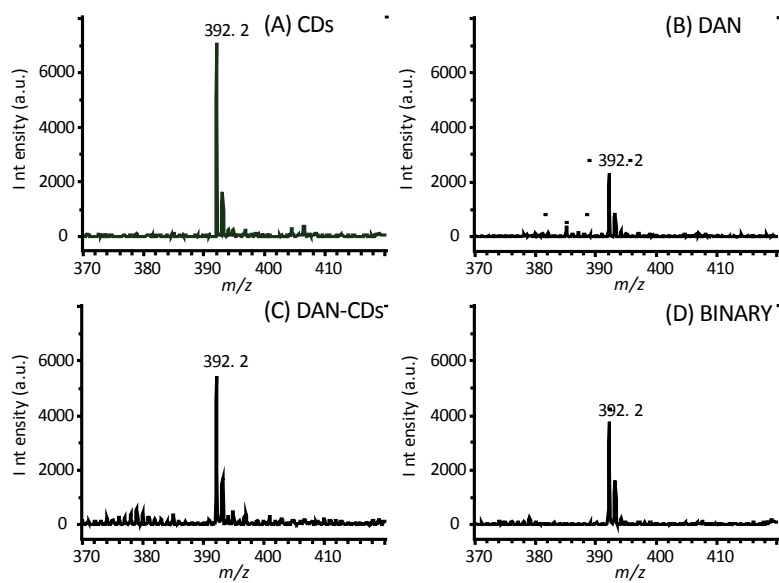

**Fig. S10** Mass spectra of erlotinib (5 mM) by using different matrices in negative ion mode ( $m/z$  392.2 [Erlotinib-H]<sup>-</sup>). Laser intensity: 50%.
